# The American Journal of Psychiatry

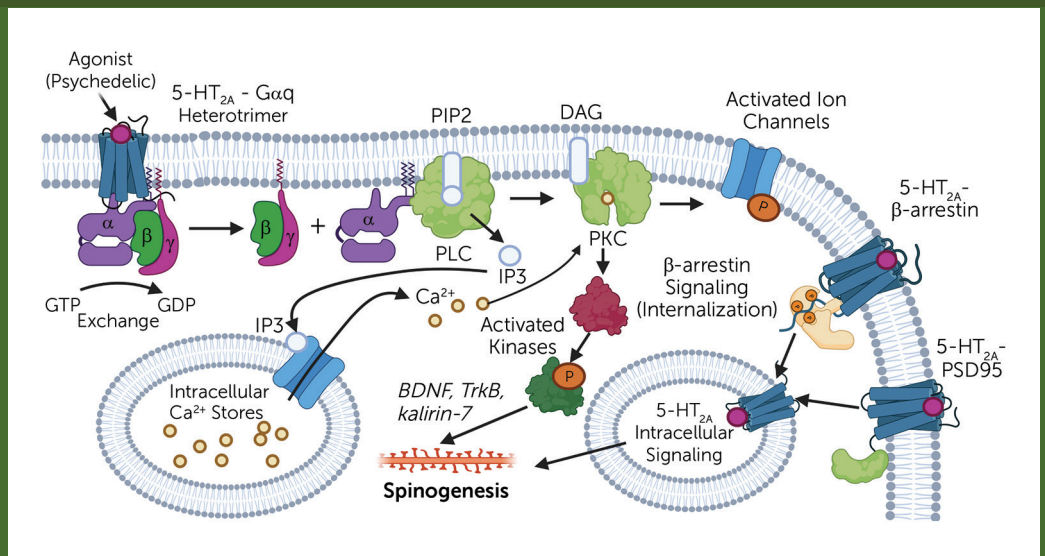

Psychedelics as Transformative Therapeutics

Double-Blind, Placebo-Controlled Study of Memantine  
in Trichotillomania and Skin-Picking Disorder

Attention Bias Modification Treatment Versus a Selective  
Serotonin Reuptake Inhibitor Or Waiting List Control  
for Social Anxiety Disorder

Antidepressant Effects of Psilocybin in the Absence  
of Psychedelic Effects
