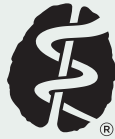

## Officers 2022–2023

### President

Rebecca W. Brendel, M.D., J.D.

### President-Elect

Petros Levounis, M.D., M.A.

### Treasurer

Richard F. Summers, M.D.

### Secretary

Sandra M. DeJong, M.D., M.Sc.

### Assembly

#### Speaker

Adam Nelson, M.D.

#### Speaker-Elect

Vasilis K. Pozios, M.D.

#### Recorder

Steven M. Starks, M.D.

### Office of the CEO and Medical Director

#### CEO and Medical Director

Saul Levin, M.D., M.P.A., F.R.C.P.-E.,  
F.R.C.Psych.

### Board of Trustees

Elie G. Aoun, M.D., M.R.O.

Jenny L. Boyer, M.D., Ph.D., J.D.

Jeffrey L. Geller, M.D., M.P.H.

Geetha Jayaram, M.B.B.S., M.B.A.

Glenn A. Martin, M.D.

Vivian B. Pender, M.D.

Eric M. Plakun, M.D.

Michele Reid, M.D.

Mary Hasbah Roessel, M.D.

Bruce J. Schwartz, M.D.

Seth L. Daly Stennis, M.D.

Felix Torres, M.D., M.B.A.

Barbara Yates Weissman, M.D.

Cheryl D. Wills, M.D.

Urooj Yazdani, M.D.

## Editorial Board

### Editor-in-Chief

Ned H. Kalin, M.D.

### Deputy Editors

Elisabeth Binder, M.D., Ph.D.

Kathleen T. Brady, M.D., Ph.D.

David A. Lewis, M.D.

William M. McDonald, M.D.

Daniel S. Pine, M.D.

Carolyn Rodriguez, M.D., Ph.D.

### Associate Editors

Olusola Ajilore, M.D., Ph.D.

Huda Akil, Ph.D.

Melissa Arbuckle, M.D., Ph.D.

Tracy Bale, Ph.D.

Eraka P.J. Bath, M.D.

Kristen Brennand, Ph.D.

Karl Deisseroth, M.D., Ph.D.

Javier I. Escobar, M.D., M.Sc.

Julie L. Fudge, M.D.

Qiyong Gong, M.D., Ph.D.

Raquel E. Gur, M.D., Ph.D.

Helena Hansen, M.D., Ph.D.

David C. Henderson, M.D.

Yasmin Hurd, Ph.D.

Clinton D. Kiltz, Ph.D.

Carlos López Jaramillo, M.D., M.Sc., Ph.D.

Francis Lee, M.D., Ph.D.

John C. Markowitz, M.D.

Charles B. Nemeroff, M.D., Ph.D.

Roy Perlis, M.D.

Diego A. Pizzagalli, Ph.D.

Kerry Ressler, M.D., Ph.D.

Bryan L. Roth, M.D., Ph.D.

David Rubinow, M.D.

Alan F. Schatzberg, M.D.

Giulio Tononi, M.D., Ph.D.

Nim Tottenham, Ph.D.

John T. Walkup, M.D.

Daniel R. Weinberger, M.D.

### Statistical Editors

Amy L. Cochran, Ph.D.

Adrienne Grzenda, M.D., Ph.D.

Dustin Scheinost, Ph.D.

### Editors Emeriti

Nancy C. Andreasen, M.D., Ph.D.

Robert Freedman, M.D.

### Former Editors

Amariah Brigham, M.D., 1844–1849

T. Romeyn Beck, M.D., 1849–1854

John P. Gray, M.D., 1854–1886

G. Alder Blumer, M.D., 1886–1894

Richard Dewey, M.D., 1894–1897

Henry M. Hurd, M.D., 1897–1904

Edward N. Brush, M.D., 1904–1931

Clarence B. Farrar, M.D., 1931–1965

Francis J. Braceland, M.D., 1965–1978

John C. Nemiah, M.D., 1978–1993

### Editorial Staff

#### Executive Editor

Michael D. Roy

#### Senior Editors

John J. Guardiano, Ph.D.

Drake Morgan, Ph.D.

#### Production Manager

Susan Westrate

#### Online Content Manager

Aaron van Dorn

#### Editorial Support Services Manager

Heidi Koch-Bubel

#### Editorial Assistants

Linda LaCour

Nicole Wilder

### Publisher

Simone Taylor, Ph.D.
